# Supplementary material for: Mitosis Counting in Breast Cancer: Object-Level Interobserver Agreement and Comparison to an Automatic Method
Source: PLoS One. 2016 Aug 16;11(8):e0161286. doi: 10.1371/journal.pone.0161286 (PMC4987048; doi:10.1371/journal.pone.0161286)
Supplement: S1 Table — (XLSX) [file pone.0161286.s006.xlsx]

## Sheet: Data
Mitotic figure counts and agreement on individual objects for the three pathologists and the automatic method. The object-level agreement was assessed only for cases for which annotations of the individual objects by all three observes were available (N=84).
ID	Observer 1	Observer 2	Observer 3	Automatic method	Observer 1 ∩ Observer 2	Observer 1 ∩ Observer 3	Observer 2 ∩ Observer3	Observer 1 ∩ Automatic method	Observer 2 ∩ Automatic method	Observer 3 ∩ Automatic method
1	8	10	13	10	7	7	8	5	6	7
2	2	1	4	0	1	0	0	0	0	0
3	2	0	2	2	0	0	0	0	0	0
4	1	0	2	0	n/a	n/a	n/a	n/a	n/a	n/a
5	4	2	5	4	2	2	1	4	2	2
6	2	1	2	1	1	1	1	1	1	1
7	3	3	0	3	2	0	0	0	0	0
8	1	0	1	8	0	1	0	1	0	1
9	6	3	11	2	3	4	1	2	1	1
10	6	7	4	2	4	3	3	2	2	2
11	8	8	7	1	2	4	2	1	1	1
12	17	12	14	1	8	4	5	1	1	0
13	0	0	0	1	0	0	0	0	0	0
14	7	7	7	2	4	2	4	0	2	1
15	7	4	5	2	4	2	2	2	2	1
16	0	0	0	6	0	0	0	0	0	0
17	5	3	2	0	1	0	0	0	0	0
18	4	4	8	5	3	3	4	2	3	3
19	5	4	9	5	3	4	3	3	2	4
20	6	4	7	1	n/a	n/a	n/a	n/a	n/a	n/a
21	15	6	15	4	5	6	3	1	2	1
22	1	0	9	5	0	1	0	1	0	1
23	4	0	8	10	0	3	0	4	0	5
24	7	3	9	7	3	4	3	4	2	3
25	24	26	20	19	16	12	16	11	15	13
26	33	41	36	13	30	22	30	9	12	11
27	0	0	2	1	0	0	0	0	0	0
28	0	0	0	1	0	0	0	0	0	0
29	0	0	0	0	0	0	0	0	0	0
30	1	0	2	0	0	0	0	0	0	0
31	3	0	4	1	0	1	0	1	0	0
32	20	16	16	10	14	12	12	10	7	7
33	28	30	26	29	22	21	23	20	24	23
34	0	1	0	4	0	0	0	0	0	0
35	1	0	8	1	0	1	0	0	0	1
36	16	15	17	14	11	11	9	8	8	7
37	5	5	5	5	4	3	2	2	2	1
38	19	17	27	10	14	16	14	10	9	9
39	6	3	6	4	1	1	1	2	0	1
40	3	1	4	2	1	1	1	1	1	1
41	5	2	8	0	0	3	1	0	0	0
42	3	1	2	1	1	0	0	0	0	0
43	0	0	2	0	0	0	0	0	0	0
44	2	1	4	1	1	0	0	0	0	1
45	5	4	7	3	4	2	2	2	2	2
46	7	3	3	4	3	2	2	3	1	1
47	4	1	2	0	1	1	1	0	0	0
48	21	29	23	8	13	9	13	5	7	7
49	2	6	6	3	n/a	n/a	n/a	n/a	n/a	n/a
50	17	20	16	16	15	11	13	12	12	10
51	19	15	24	23	n/a	n/a	n/a	n/a	n/a	n/a
52	6	7	7	8	6	6	7	6	7	7
53	5	6	7	6	2	5	2	3	3	3
54	32	48	33	31	n/a	n/a	n/a	n/a	n/a	n/a
55	5	1	9	3	n/a	n/a	n/a	n/a	n/a	n/a
56	4	3	7	9	n/a	n/a	n/a	n/a	n/a	n/a
57	5	3	8	1	3	5	3	1	1	1
58	1	1	2	1	n/a	n/a	n/a	n/a	n/a	n/a
59	22	11	15	20	n/a	n/a	n/a	n/a	n/a	n/a
60	34	20	29	20	19	22	14	17	14	14
61	1	0	2	18	0	0	0	0	0	0
62	4	1	7	10	1	2	1	2	1	3
63	48	22	24	15	n/a	n/a	n/a	n/a	n/a	n/a
64	3	3	7	4	3	1	1	3	3	1
65	4	0	3	7	0	2	0	3	0	3
66	1	1	1	2	1	1	1	1	1	1
67	2	1	0	2	1	0	0	1	1	0
68	15	13	11	14	8	8	7	7	8	7
69	53	43	33	35	n/a	n/a	n/a	n/a	n/a	n/a
70	6	6	6	11	6	4	4	6	6	5
71	3	2	1	1	2	0	0	1	1	0
72	4	3	2	16	n/a	n/a	n/a	n/a	n/a	n/a
73	17	12	8	6	10	6	7	4	5	2
74	14	13	8	5	9	4	6	4	5	2
75	25	23	33	23	11	14	10	11	9	11
76	11	7	7	8	6	5	2	6	4	4
77	26	19	20	21	16	14	14	17	19	15
78	64	69	53	60	53	47	47	44	51	40
79	34	46	42	38	34	34	42	28	33	33
80	4	2	4	2	2	2	2	2	2	2
81	0	1	2	5	0	0	1	0	0	0
82	9	12	11	3	4	5	5	2	3	1
83	72	79	51	39	60	45	44	31	35	29
84	6	4	4	8	4	2	1	4	3	2
85	2	2	3	5	n/a	n/a	n/a	n/a	n/a	n/a
86	3	0	1	1	0	0	0	0	0	1
87	14	11	10	20	9	8	6	10	8	9
88	4	6	1	11	n/a	n/a	n/a	n/a	n/a	n/a
89	15	12	26	19	5	8	10	6	6	10
90	8	7	2	10	6	2	2	6	6	2
91	0	0	0	10	0	0	0	0	0	0
92	4	1	5	4	0	0	1	0	1	1
93	0	0	0	1	0	0	0	0	0	0
94	5	7	4	4	3	3	3	2	3	3
95	2	1	4	4	1	1	1	1	1	1
96	16	7	11	14	5	7	7	8	6	9
97	0	0	1	2	0	0	0	0	0	0
98	63	29	41	24	n/a	n/a	n/a	n/a	n/a	n/a
99	6	5	4	5	2	3	2	2	4	2
100	94	96	70	46	n/a	n/a	n/a	n/a	n/a	n/a
